# Supplementary figures and images for: EpCAM- and EGFR-Specific Antibody Drug Conjugates for Triple-Negative Breast Cancer Treatment
Source: MDPI journal article supplement (doi:10.3390/ijms23116122), 2022-05-30

Figure S1

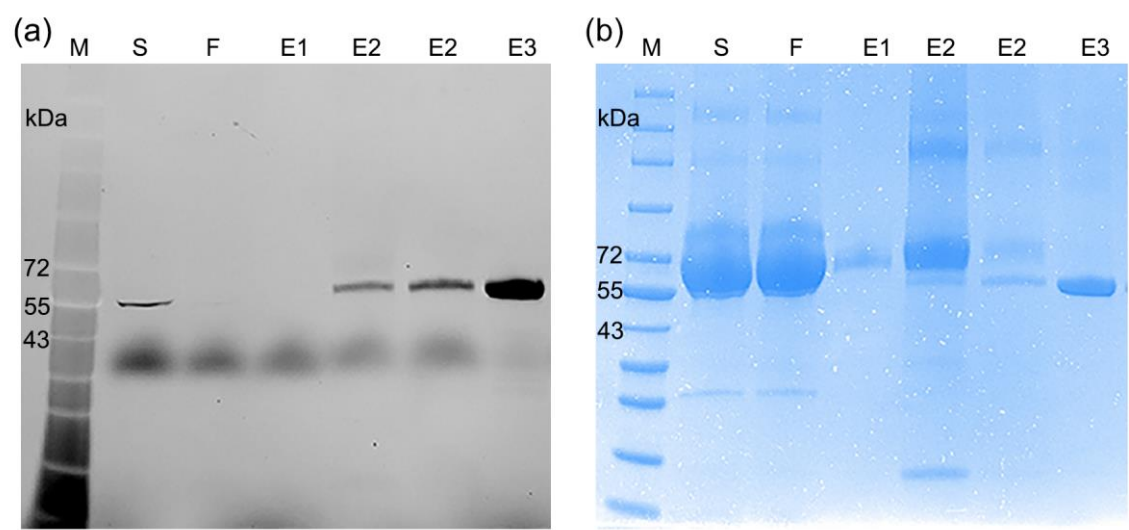

Figure S2

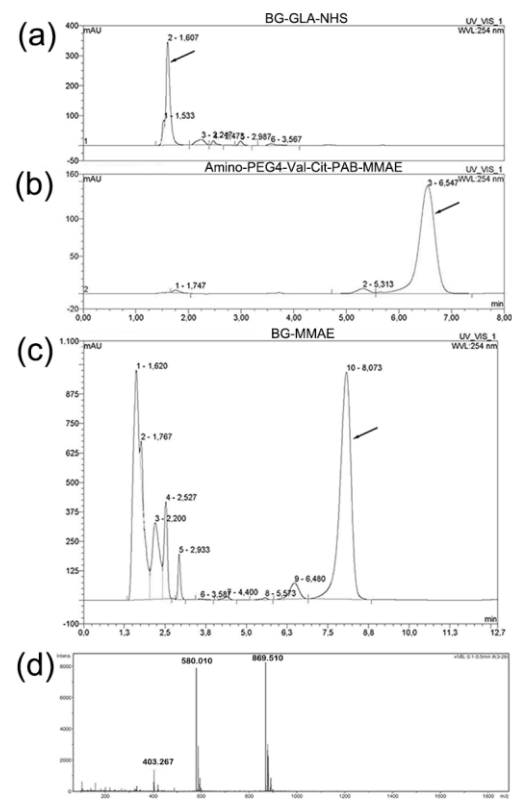

Supplement: s1 [file s1]
